# Supplementary material
Source: PubMed Central journal article supplement (PMC528792)
Supplement: nar_32_19_5712__1.pdf [file nar_32_19_5712__1.pdf]

## ONLINE SUPPLEMENT

### ***Plasmodium* Interspersed Repeats: The major multigene superfamily of malaria parasites**

Christoph S. Janssen, R. Stephen Phillips, C. Michael R. Turner, Michael P. Barrett

Institute of Biomedical and Life Sciences, Division of Infection & Immunity, IBLs,  
University of Glasgow, Glasgow G12 8QQ, UK.

## MATERIALS AND METHODS

### **Protein detection and localisation**

CIR protein was localized in *P. chabaudi* infected erythrocytes using indirect fluorescent antibody techniques (IFAT). Peptides were designed using expressed mRNA sequence (7) as a template and synthesised commercially (Genosphere Biotech.). 15mer peptides were designed to both variant and conserved regions, as determined from a CIR/ YIR alignment of 73 putative protein sequences. Sequences of the two peptides used successfully were as follows: cir\_pep\_2: CSQKASEFVKSEFKEL (conserved) and cir\_pep\_1: CKINQHPNKKFGTND (variant). Rabbit antibodies to the peptides were commercially produced (Genosphere Biotech.) and used in binding assays on blood smears infected with the same stabilate of *P. chabaudi* that had provided the *cir* mRNA sequence. Thin blood smears were fixed in acetone for 15 min at room temperature, or for 4 h in 2% Formaldehyde/ PBS at room temperature. Smears were re-hydrated for 10 min in PBS before being blocked for 20 min with 0.01% Tween 20, 0.05% Sodium Azide and 1% BSA. Incubations with the rabbit anti-*cir*

## RESULTS

### Rodent malaria *cir/bir/yir* and *P. falciparum rif* introns

**Table 1**

#### Conserved sequence motifs in the first intron from rodent malaria *cir* homologues

MOTIF WIDTH BEST POSSIBLE MATCH

```
-----  
1 15 AATGTTTTCGTAGTG  
2 15 TGGTATATGCACTTT  
3 15 TATAAATATCATTA  
4 15 TAGTTTCCGTAACAT  
5 15 CAATAATACGCGCTT  
6 15 TTTCGGATGTTGCAT  
7 15 ACTTTATTTAATAA  
8 11 TGTTTAATTCG
```

#### Conserved sequence motifs in the second intron from rodent malaria *cir* homologues

MOTIF WIDTH BEST POSSIBLE MATCH

```
-----  
1 9 AAGGTAAAT  
2 9 TATTAGTAT  
3 9 TAAGGAATT  
4 9 TATGCAAAC  
5 9 TACGCTTCT  
6 9 TTTCATTA  
7 9 GTTAACAAA  
8 9 TAACATTTT
```

1<sup>st</sup> *cir* introns:

Based on conserved sequence motifs, the first intron sequences can be subdivided into at least 10 conserved sequence families.

2<sup>nd</sup> *cir* introns:

The presence and distribution of the consensus intron sequence motifs indicated that second intron sequences can be assigned to at least 7 conserved sub-families of intron sequences.

## Figure 1

Maximum likelihood tree (dnaml) of an alignment of 503 *rif* and *cir/yir* 2<sup>nd</sup> introns

SEE SEPARATE FILE “Supplementary Figure 1” FOR LARGER AND LEGIBLE IMAGE

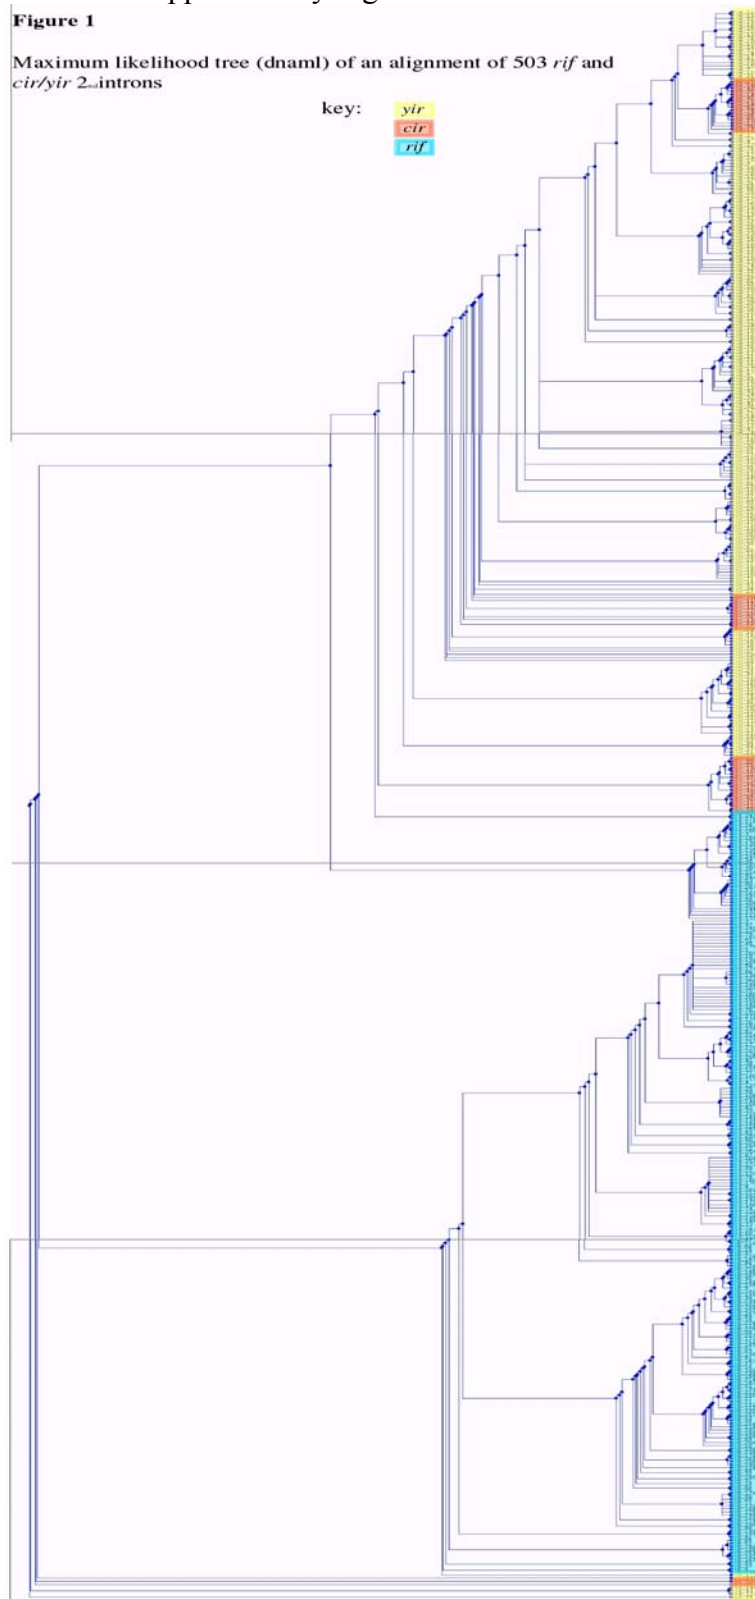

Tree -reconstruction analysis of an alignment of 503 *rif* and *cir/yir* 2<sup>nd</sup> introns shows 35 *rif* introns as more similar to the rodent malaria introns than those from other *rifs* (see main text).

## **Superfamily trees**

A total of 157 amino acid sequences of members from *rif*, *vir*, *kir*, *yir* and *cir* were aligned using clustalW and dialign. The best global alignment (clustalW) was chosen for phylogenetic analysis. Poorly aligned positions and divergent regions of the alignment were eliminated and only conserved regions chosen (185 aa) (see main text). Thus, the variant domains of the proteins were eliminated from the analyses. Phylogenetic analysis was performed on the dataset using the maximum likelihood method applied to pairwise sequence distances calculated using quartet puzzling, which automatically assigns estimations of support to each internal branch (see main text) and using the maximum likelihood method implemented by the proml algorithm.

**Figure 2**

tree reconstruction using maximum likelihood method applied to pairwise sequence distances calculated using quartet puzzling

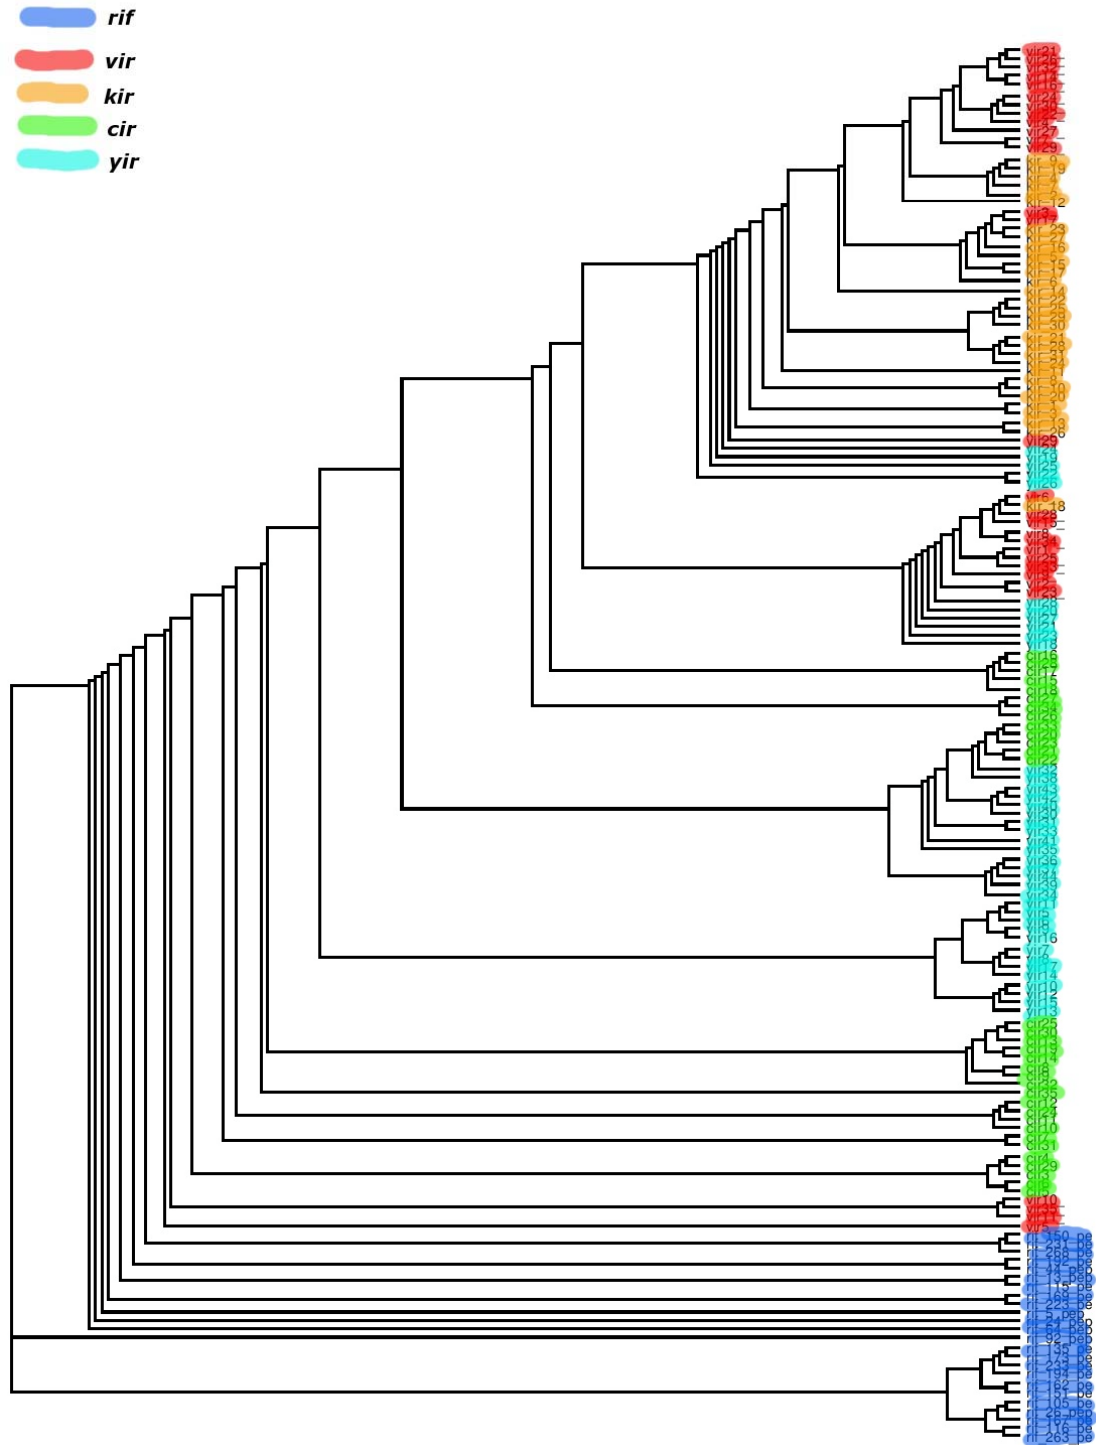

**Figure 3**  
tree reconstruction using the maximum likelihood method implemented by the proml algorithm

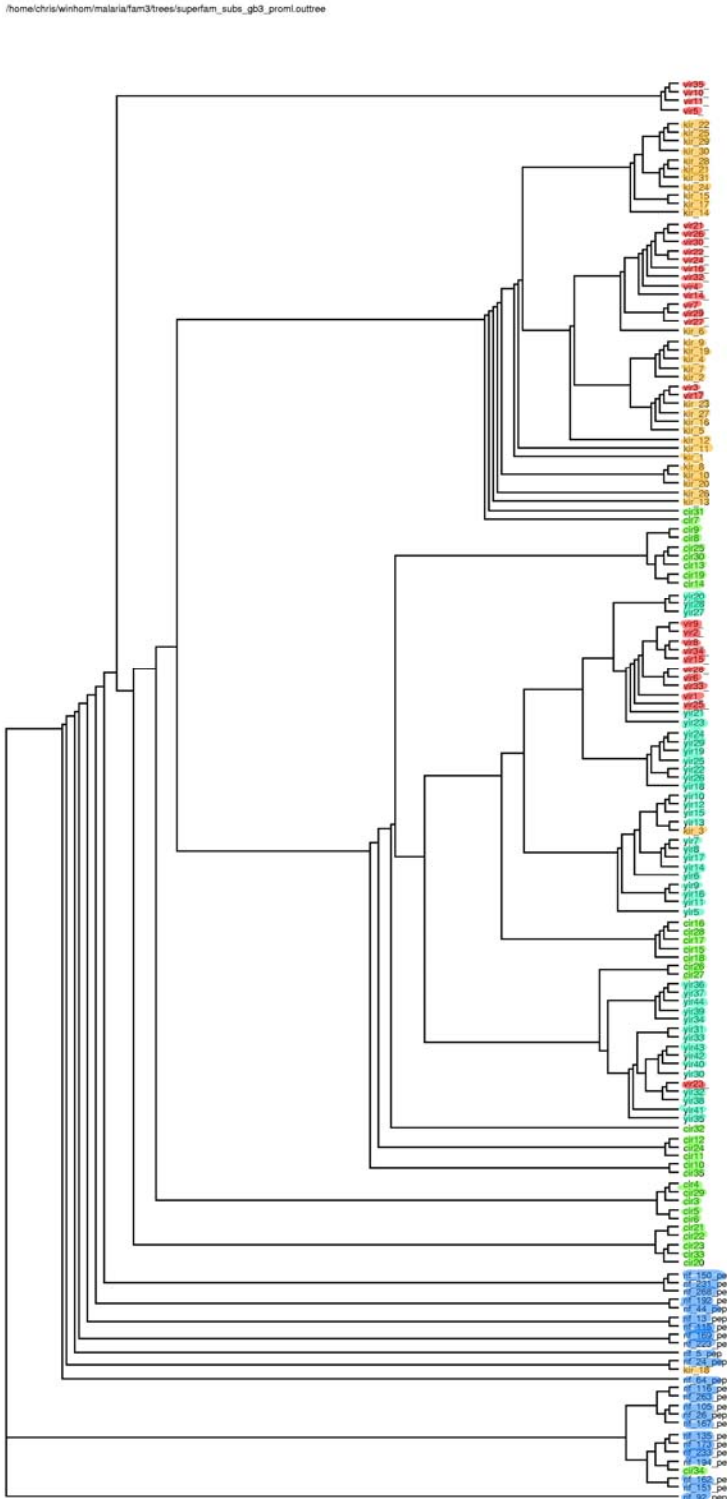

### **Protein detection and localisation**

Localisation of CIR protein in the parasite and infected erythrocyte using anti-CIR peptide antibodies in immuno-fluorescence assays revealed that CIR proteins are exported from the parasite into the erythrocyte and appear to localize with the erythrocyte outer cell membrane. Late trophozoite stage parasite populations, which were previously shown to express specific *cir* mRNA sequences (7), could be labelled with antibodies to gene-specific peptide sequences (Figure 4). Not all parasites in a population sample showed binding of the anti-CIR antibodies; about 20% failed to label. Those parasites that did label showed an association of CIR proteins with the infected erythrocyte membrane (Figure 4) in the majority of cases. A minority of infected erythrocytes were labeled in the cytosol only. Uninfected erythrocytes failed to bind any anti-CIR antibodies and did not label. Both acetone and formaldehyde fixed smears showed binding of antibodies to infected erythrocytes. Formaldehyde fixed smears gave superior labelling of CIR protein associated with the erythrocyte membrane.

Figure 4. CIR protein labeling

**Figure 4.1.** *P. chabaudi* late trophozoites labelled with anti-*cir* antibodies.

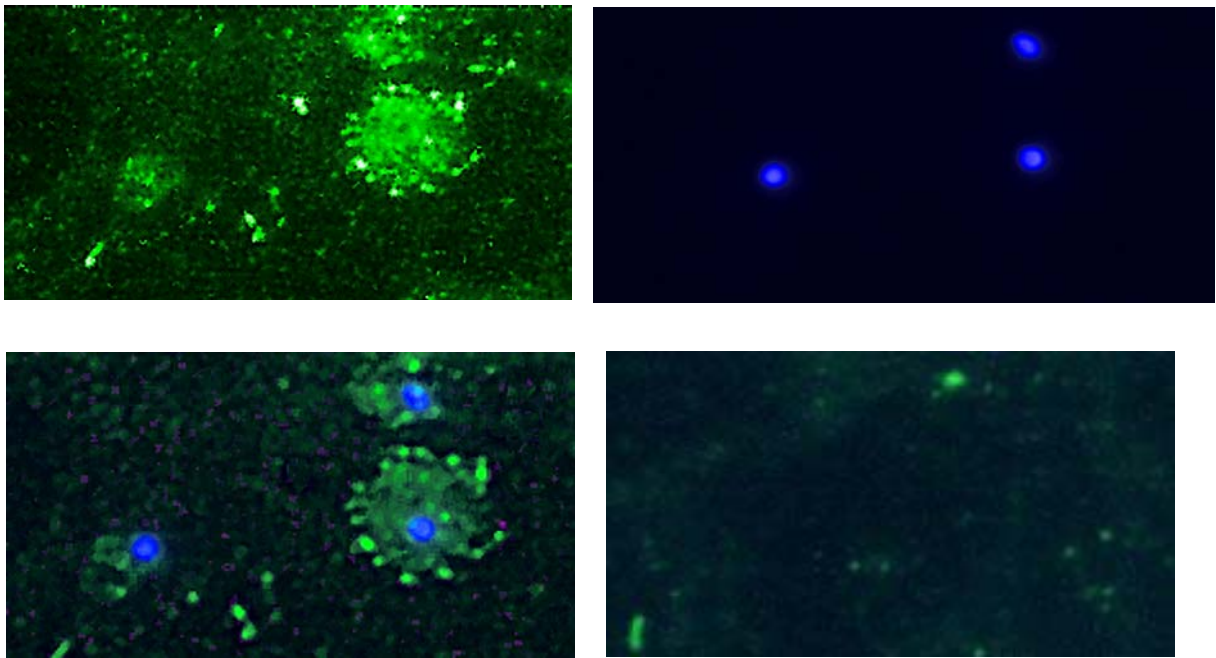

**Figure 4.2.** Western blot of *P. chabaudi* late trophozoite SDS-soluble protein fraction probed with anti-*cir* peptide antibodies.

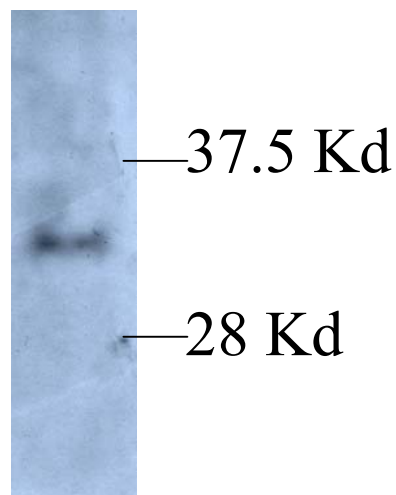

**Figure 4. Sub-cellular localisation of CIR**

#### 4.1

Thin blood smears were fixed in 2% formaldehyde for 4 h prior to processing with standard IFAT techniques and DAPI. Top left-hand panel - FITC labelled anti-*cir* peptide antibodies bound to *cir* proteins in/on *P. chabaudi* infected erythrocytes. Top right panel - The same parasites as depicted in top left stained with DAPI. Bottom left-hand panel DAPI and FITC stains merged. Bottom right panel FITC labelled pre-immune control serum.



## 4.2

Parasite extracts and erythrocyte ghosts were obtained by saponin lysis of *P. chabaudi* late trophozoite infected blood and subsequent centrifugation. The triton X-100 insoluble/ SDS soluble fraction obtained from the parasite/ ghost pellet was electrophoresed on a 5% - 20% gradient SDS-PAGE gel and blotted onto nitrocellulose. The blot was probed with anti-*cir* peptide antibodies using standard methods. Only one distinct labelled band was detected by using the Phototope\_HRP detection system (Cell Signalling Tech.).

## Superfamily sequence motifs

Neural network analysis reveals that at least four amino acid sequence motifs are conserved in all members of the PIR superfamily. The VIR and KIR members of the family share a further three amino acid motifs not found in other members. Interestingly the position of some motifs showed shifts in relative position in different members of the superfamily. For example motif 7 in the RIFIN sequences resides upstream of its relative position in the CIR family.

## PROBABILITY MATRICES AND HMMs

### CIR and RIFIN motifs:

motif 2

letter-probability matrix: alength= 20 w= 12 n= 61247 E= 5.6e-561

|          |          |          |          |          |          |          |          |
|----------|----------|----------|----------|----------|----------|----------|----------|
| 0.041253 | 0.000918 | 0.000890 | 0.005653 | 0.001162 | 0.024662 | 0.000593 | 0.002422 |
| 0.038952 | 0.054441 | 0.001231 | 0.002057 | 0.033664 | 0.000958 | 0.015391 | 0.646481 |
| 0.041035 | 0.021537 | 0.000280 | 0.066420 |          |          |          |          |
| 0.003690 | 0.000924 | 0.001394 | 0.001609 | 0.013133 | 0.008112 | 0.000630 | 0.620597 |
| 0.002038 | 0.050449 | 0.020008 | 0.005026 | 0.000936 | 0.001286 | 0.001443 | 0.002668 |
| 0.014007 | 0.246446 | 0.000484 | 0.005120 |          |          |          |          |
| 0.154238 | 0.000631 | 0.000316 | 0.000597 | 0.041920 | 0.005784 | 0.000442 | 0.216308 |
| 0.000705 | 0.140900 | 0.001643 | 0.010716 | 0.040955 | 0.000629 | 0.000695 | 0.052017 |
| 0.072842 | 0.247369 | 0.000291 | 0.011001 |          |          |          |          |
| 0.554914 | 0.002384 | 0.001025 | 0.001569 | 0.057840 | 0.022159 | 0.000588 | 0.006524 |
| 0.005823 | 0.072827 | 0.001413 | 0.027246 | 0.000610 | 0.001035 | 0.018769 | 0.100994 |
| 0.029541 | 0.093685 | 0.000348 | 0.000705 |          |          |          |          |
| 0.012605 | 0.000474 | 0.000216 | 0.000378 | 0.000821 | 0.051849 | 0.000268 | 0.610146 |
| 0.102628 | 0.068839 | 0.000936 | 0.000407 | 0.061671 | 0.000405 | 0.000447 | 0.001398 |
| 0.052504 | 0.033333 | 0.000170 | 0.000504 |          |          |          |          |
| 0.017576 | 0.005681 | 0.000318 | 0.000601 | 0.127736 | 0.010823 | 0.000443 | 0.054324 |
| 0.000709 | 0.460520 | 0.001686 | 0.000595 | 0.035836 | 0.000635 | 0.000701 | 0.026666 |
| 0.012094 | 0.231782 | 0.000292 | 0.010983 |          |          |          |          |
| 0.036192 | 0.010265 | 0.000490 | 0.000760 | 0.016053 | 0.010402 | 0.000472 | 0.491811 |
| 0.000920 | 0.055813 | 0.002403 | 0.000759 | 0.010135 | 0.000734 | 0.000815 | 0.011205 |
| 0.011870 | 0.337567 | 0.000322 | 0.001013 |          |          |          |          |
| 0.047976 | 0.000630 | 0.000316 | 0.000597 | 0.036860 | 0.005784 | 0.000442 | 0.509809 |
| 0.000704 | 0.080174 | 0.001640 | 0.000595 | 0.167464 | 0.000628 | 0.000694 | 0.026717 |
| 0.012118 | 0.055078 | 0.040773 | 0.011003 |          |          |          |          |
| 0.078910 | 0.001204 | 0.000848 | 0.001248 | 0.010508 | 0.010156 | 0.000703 | 0.199286 |
| 0.001181 | 0.095087 | 0.001690 | 0.000888 | 0.001004 | 0.000884 | 0.001301 | 0.011029 |
| 0.012887 | 0.570204 | 0.000281 | 0.000701 |          |          |          |          |
| 0.006102 | 0.000524 | 0.000422 | 0.000849 | 0.011639 | 0.027349 | 0.000482 | 0.068264 |
| 0.000926 | 0.728868 | 0.004506 | 0.000560 | 0.076656 | 0.001073 | 0.001099 | 0.018936 |
| 0.014849 | 0.031256 | 0.004812 | 0.000829 |          |          |          |          |
| 0.021557 | 0.000693 | 0.000542 | 0.005524 | 0.030033 | 0.005557 | 0.000482 | 0.429427 |
| 0.000985 | 0.178681 | 0.012060 | 0.010238 | 0.005286 | 0.000766 | 0.000852 | 0.039397 |
| 0.002371 | 0.244735 | 0.000331 | 0.010484 |          |          |          |          |
| 0.053036 | 0.000631 | 0.000316 | 0.000597 | 0.036860 | 0.036145 | 0.000442 | 0.226429 |
| 0.005765 | 0.049818 | 0.441873 | 0.005656 | 0.000474 | 0.000629 | 0.005755 | 0.011536 |
| 0.072842 | 0.050024 | 0.000291 | 0.000881 |          |          |          |          |

motif 3

letter-probability matrix: alength= 20 w= 11 n= 61452 E= 7.1e-922

|          |          |          |          |          |          |          |          |
|----------|----------|----------|----------|----------|----------|----------|----------|
| 0.000145 | 0.016872 | 0.000072 | 0.000080 | 0.007934 | 0.000106 | 0.000465 | 0.000218 |
|----------|----------|----------|----------|----------|----------|----------|----------|

|          |          |          |          |          |          |          |          |
|----------|----------|----------|----------|----------|----------|----------|----------|
| 0.000110 | 0.000524 | 0.005739 | 0.000175 | 0.000080 | 0.000154 | 0.000151 | 0.000187 |
| 0.000142 | 0.000235 | 0.000457 | 0.966154 |          |          |          |          |
| 0.391095 | 0.000680 | 0.000342 | 0.000646 | 0.045336 | 0.011722 | 0.000477 | 0.042400 |
| 0.017176 | 0.432193 | 0.007267 | 0.000642 | 0.000513 | 0.000681 | 0.000753 | 0.001524 |
| 0.002152 | 0.037665 | 0.000314 | 0.006422 |          |          |          |          |
| 0.003859 | 0.000966 | 0.001458 | 0.001683 | 0.006647 | 0.001345 | 0.000660 | 0.769536 |
| 0.002132 | 0.056692 | 0.006651 | 0.001687 | 0.000979 | 0.001345 | 0.001508 | 0.002790 |
| 0.011166 | 0.122984 | 0.000508 | 0.005407 |          |          |          |          |
| 0.001699 | 0.000546 | 0.000437 | 0.000880 | 0.002826 | 0.000566 | 0.000500 | 0.044514 |
| 0.000959 | 0.906235 | 0.028772 | 0.000580 | 0.000739 | 0.001113 | 0.001139 | 0.001106 |
| 0.001504 | 0.004662 | 0.000360 | 0.000866 |          |          |          |          |
| 0.000167 | 0.000079 | 0.000087 | 0.000125 | 0.007815 | 0.000121 | 0.017257 | 0.000221 |
| 0.006016 | 0.006117 | 0.000146 | 0.000208 | 0.000088 | 0.000236 | 0.436768 | 0.005808 |
| 0.000170 | 0.000244 | 0.515161 | 0.003167 |          |          |          |          |
| 0.000145 | 0.000079 | 0.000066 | 0.000076 | 0.080537 | 0.000096 | 0.000419 | 0.011598 |
| 0.000104 | 0.431977 | 0.000268 | 0.000159 | 0.000077 | 0.000149 | 0.000142 | 0.000168 |
| 0.000146 | 0.005927 | 0.000418 | 0.467449 |          |          |          |          |
| 0.002075 | 0.077578 | 0.000667 | 0.000690 | 0.006842 | 0.039328 | 0.000486 | 0.030465 |
| 0.000798 | 0.014379 | 0.001290 | 0.105586 | 0.000435 | 0.006149 | 0.424549 | 0.271169 |
| 0.001715 | 0.003499 | 0.000272 | 0.012026 |          |          |          |          |
| 0.001218 | 0.000275 | 0.035804 | 0.001583 | 0.006029 | 0.001381 | 0.034005 | 0.000773 |
| 0.001863 | 0.000928 | 0.000285 | 0.014235 | 0.000489 | 0.000988 | 0.462043 | 0.068758 |
| 0.001228 | 0.000633 | 0.000107 | 0.367375 |          |          |          |          |
| 0.002780 | 0.000669 | 0.001104 | 0.008573 | 0.000467 | 0.001288 | 0.000884 | 0.018863 |
| 0.877792 | 0.001524 | 0.035300 | 0.015819 | 0.001007 | 0.001427 | 0.023319 | 0.001693 |
| 0.005348 | 0.001201 | 0.000353 | 0.000590 |          |          |          |          |
| 0.003317 | 0.000996 | 0.000925 | 0.006840 | 0.001940 | 0.001261 | 0.000656 | 0.180262 |
| 0.390709 | 0.301266 | 0.018431 | 0.023336 | 0.000807 | 0.001056 | 0.017493 | 0.013265 |
| 0.008281 | 0.021758 | 0.000388 | 0.007013 |          |          |          |          |
| 0.001838 | 0.000172 | 0.018058 | 0.002302 | 0.022329 | 0.001018 | 0.000859 | 0.011574 |
| 0.510101 | 0.012017 | 0.000457 | 0.265819 | 0.000584 | 0.013037 | 0.090830 | 0.035051 |
| 0.007019 | 0.000851 | 0.000121 | 0.005962 |          |          |          |          |

motif 4

letter-probability matrix: alength= 20 w= 12 n= 61247 E= 1.3e-616

|          |          |          |          |          |          |          |          |
|----------|----------|----------|----------|----------|----------|----------|----------|
| 0.017590 | 0.498985 | 0.000441 | 0.007950 | 0.243945 | 0.001004 | 0.000620 | 0.047872 |
| 0.015276 | 0.005860 | 0.002250 | 0.000830 | 0.000655 | 0.000886 | 0.121980 | 0.009077 |
| 0.002750 | 0.013252 | 0.000405 | 0.008372 |          |          |          |          |
| 0.001073 | 0.000120 | 0.767109 | 0.110904 | 0.000168 | 0.065737 | 0.022108 | 0.000199 |
| 0.008299 | 0.000323 | 0.000124 | 0.018087 | 0.000430 | 0.001035 | 0.000583 | 0.002057 |
| 0.001003 | 0.000311 | 0.000054 | 0.000276 |          |          |          |          |
| 0.003611 | 0.000889 | 0.001185 | 0.008884 | 0.000608 | 0.001595 | 0.001100 | 0.002100 |
| 0.907254 | 0.001978 | 0.000975 | 0.009433 | 0.001309 | 0.005233 | 0.032463 | 0.012651 |
| 0.002424 | 0.001554 | 0.000468 | 0.004285 |          |          |          |          |
| 0.010317 | 0.000214 | 0.223640 | 0.334869 | 0.014679 | 0.015651 | 0.001127 | 0.000796 |
| 0.018226 | 0.036892 | 0.000659 | 0.101800 | 0.000998 | 0.024490 | 0.186829 | 0.017330 |
| 0.009413 | 0.001275 | 0.000154 | 0.000643 |          |          |          |          |
| 0.010425 | 0.000901 | 0.000520 | 0.000907 | 0.029879 | 0.001050 | 0.000631 | 0.653938 |
| 0.001081 | 0.132536 | 0.002637 | 0.007846 | 0.000695 | 0.000924 | 0.028786 | 0.085352 |
| 0.002917 | 0.030319 | 0.000420 | 0.008235 |          |          |          |          |
| 0.005584 | 0.001123 | 0.020872 | 0.030863 | 0.001229 | 0.001782 | 0.070242 | 0.002509 |
| 0.046406 | 0.011054 | 0.003639 | 0.013537 | 0.007151 | 0.760884 | 0.010315 | 0.004474 |
| 0.003566 | 0.002737 | 0.000797 | 0.001237 |          |          |          |          |
| 0.001205 | 0.000063 | 0.009614 | 0.108473 | 0.000097 | 0.000544 | 0.000477 | 0.029184 |
| 0.639195 | 0.000582 | 0.000247 | 0.029724 | 0.000404 | 0.023654 | 0.154095 | 0.000917 |
| 0.000766 | 0.000509 | 0.000057 | 0.000194 |          |          |          |          |
| 0.003280 | 0.000848 | 0.007588 | 0.000892 | 0.002018 | 0.000987 | 0.007740 | 0.660084 |
| 0.008135 | 0.019986 | 0.002205 | 0.000835 | 0.007764 | 0.221589 | 0.000979 | 0.001925 |
| 0.002695 | 0.027369 | 0.000408 | 0.022673 |          |          |          |          |
| 0.010532 | 0.000887 | 0.007558 | 0.022177 | 0.002021 | 0.001018 | 0.014844 | 0.595540 |
| 0.000994 | 0.020229 | 0.009418 | 0.015061 | 0.000667 | 0.000885 | 0.000978 | 0.009102 |

|          |          |          |          |          |          |          |          |
|----------|----------|----------|----------|----------|----------|----------|----------|
| 0.017033 | 0.027629 | 0.000409 | 0.243017 |          |          |          |          |
| 0.020170 | 0.000703 | 0.012551 | 0.073050 | 0.015615 | 0.006724 | 0.018624 | 0.031650 |
| 0.007235 | 0.726168 | 0.012040 | 0.000751 | 0.000956 | 0.001440 | 0.013460 | 0.013416 |
| 0.001942 | 0.041930 | 0.000463 | 0.001112 |          |          |          |          |
| 0.008364 | 0.000177 | 0.007869 | 0.001376 | 0.014516 | 0.000706 | 0.000753 | 0.014899 |
| 0.652475 | 0.001039 | 0.000433 | 0.015518 | 0.000404 | 0.001960 | 0.254435 | 0.008389 |
| 0.008233 | 0.007956 | 0.000124 | 0.000373 |          |          |          |          |
| 0.001103 | 0.000088 | 0.627646 | 0.250606 | 0.000128 | 0.008478 | 0.007797 | 0.000179 |
| 0.008435 | 0.000308 | 0.007338 | 0.053530 | 0.000430 | 0.001217 | 0.000552 | 0.016234 |
| 0.000925 | 0.000309 | 0.000039 | 0.014657 |          |          |          |          |

motif 5

letter-probability matrix: alength= 20 w= 10 n= 61657 E= 5.2e-407

|          |          |          |          |          |          |          |          |
|----------|----------|----------|----------|----------|----------|----------|----------|
| 0.008134 | 0.000699 | 0.000563 | 0.001132 | 0.039346 | 0.000727 | 0.000643 | 0.019548 |
| 0.007191 | 0.817166 | 0.011970 | 0.000746 | 0.000951 | 0.001432 | 0.001466 | 0.072896 |
| 0.001929 | 0.011895 | 0.000461 | 0.001106 |          |          |          |          |
| 0.020048 | 0.000699 | 0.006519 | 0.001132 | 0.015522 | 0.000727 | 0.000643 | 0.091025 |
| 0.036973 | 0.745683 | 0.006013 | 0.000746 | 0.006907 | 0.001431 | 0.001466 | 0.007379 |
| 0.013842 | 0.041677 | 0.000460 | 0.001106 |          |          |          |          |
| 0.003101 | 0.010866 | 0.001100 | 0.001321 | 0.851897 | 0.001216 | 0.000734 | 0.009495 |
| 0.001183 | 0.040932 | 0.007358 | 0.001062 | 0.001323 | 0.000811 | 0.000979 | 0.003075 |
| 0.001550 | 0.009118 | 0.001661 | 0.051218 |          |          |          |          |
| 0.343007 | 0.029099 | 0.000457 | 0.085468 | 0.065458 | 0.001054 | 0.000622 | 0.019350 |
| 0.001009 | 0.041196 | 0.002285 | 0.050200 | 0.050020 | 0.000892 | 0.000986 | 0.171283 |
| 0.080365 | 0.020362 | 0.007457 | 0.029430 |          |          |          |          |
| 0.052098 | 0.000866 | 0.000451 | 0.000858 | 0.183397 | 0.000987 | 0.007591 | 0.186729 |
| 0.001004 | 0.449875 | 0.009565 | 0.000824 | 0.000685 | 0.042751 | 0.014953 | 0.008902 |
| 0.002720 | 0.034115 | 0.000410 | 0.001219 |          |          |          |          |
| 0.017474 | 0.000635 | 0.007624 | 0.001164 | 0.008176 | 0.001120 | 0.000613 | 0.085419 |
| 0.021855 | 0.134095 | 0.008291 | 0.014574 | 0.604752 | 0.001087 | 0.001109 | 0.064040 |
| 0.009221 | 0.017660 | 0.000275 | 0.000816 |          |          |          |          |
| 0.002181 | 0.000699 | 0.006521 | 0.001132 | 0.081070 | 0.000727 | 0.000643 | 0.108929 |
| 0.001234 | 0.703900 | 0.006005 | 0.000746 | 0.012868 | 0.001430 | 0.007424 | 0.007382 |
| 0.019808 | 0.035733 | 0.000460 | 0.001106 |          |          |          |          |
| 0.008289 | 0.000868 | 0.014635 | 0.001376 | 0.100985 | 0.002049 | 0.003794 | 0.019981 |
| 0.002244 | 0.008983 | 0.001453 | 0.737336 | 0.001188 | 0.002160 | 0.001705 | 0.061501 |
| 0.003717 | 0.014506 | 0.000583 | 0.012649 |          |          |          |          |
| 0.013227 | 0.001122 | 0.001649 | 0.001919 | 0.016608 | 0.001550 | 0.000765 | 0.703732 |
| 0.011182 | 0.088225 | 0.007536 | 0.001923 | 0.001124 | 0.001543 | 0.001730 | 0.003209 |
| 0.048308 | 0.092014 | 0.000585 | 0.002052 |          |          |          |          |
| 0.002132 | 0.000684 | 0.000550 | 0.001106 | 0.033511 | 0.102524 | 0.000633 | 0.019459 |
| 0.001206 | 0.811155 | 0.011875 | 0.000730 | 0.000929 | 0.001399 | 0.001432 | 0.001392 |
| 0.001887 | 0.005815 | 0.000456 | 0.001123 |          |          |          |          |

motif 7

letter-probability matrix: alength= 20 w= 10 n= 61657 E= 1.7e-497

|          |          |          |          |          |          |          |          |
|----------|----------|----------|----------|----------|----------|----------|----------|
| 0.134744 | 0.000395 | 0.000122 | 0.000139 | 0.000114 | 0.014952 | 0.000078 | 0.000160 |
| 0.000115 | 0.021001 | 0.000120 | 0.000238 | 0.007235 | 0.000172 | 0.000161 | 0.811676 |
| 0.007904 | 0.000562 | 0.000036 | 0.000075 |          |          |          |          |
| 0.000722 | 0.000244 | 0.000070 | 0.000102 | 0.000332 | 0.013894 | 0.000036 | 0.527850 |
| 0.000103 | 0.001799 | 0.028009 | 0.000097 | 0.000087 | 0.000070 | 0.000075 | 0.000198 |
| 0.021232 | 0.404933 | 0.000027 | 0.000119 |          |          |          |          |
| 0.198366 | 0.000839 | 0.000420 | 0.007523 | 0.001911 | 0.007691 | 0.000587 | 0.166513 |
| 0.027852 | 0.120066 | 0.002181 | 0.000791 | 0.135203 | 0.000835 | 0.000924 | 0.001882 |
| 0.049757 | 0.275101 | 0.000386 | 0.001170 |          |          |          |          |
| 0.534527 | 0.002267 | 0.000998 | 0.001580 | 0.055244 | 0.004261 | 0.000692 | 0.009496 |
| 0.007498 | 0.064099 | 0.001930 | 0.066674 | 0.000725 | 0.001151 | 0.025249 | 0.151404 |
| 0.015654 | 0.055136 | 0.000423 | 0.000992 |          |          |          |          |
| 0.008200 | 0.000392 | 0.000158 | 0.000276 | 0.000731 | 0.000334 | 0.000175 | 0.613970 |

|          |          |          |          |          |          |          |          |
|----------|----------|----------|----------|----------|----------|----------|----------|
| 0.178341 | 0.043875 | 0.000899 | 0.000272 | 0.000224 | 0.000265 | 0.000294 | 0.000623 |
| 0.117491 | 0.032982 | 0.000118 | 0.000382 |          |          |          |          |
| 0.000538 | 0.000193 | 0.000076 | 0.000139 | 0.007847 | 0.000117 | 0.000086 | 0.037436 |
| 0.000148 | 0.668103 | 0.001409 | 0.000105 | 0.000135 | 0.000189 | 0.000169 | 0.000191 |
| 0.000454 | 0.282317 | 0.000103 | 0.000243 |          |          |          |          |
| 0.000622 | 0.000226 | 0.000060 | 0.000083 | 0.000297 | 0.000087 | 0.000021 | 0.679740 |
| 0.000080 | 0.008625 | 0.000428 | 0.000077 | 0.000070 | 0.000049 | 0.000052 | 0.000132 |
| 0.000513 | 0.308725 | 0.000018 | 0.000092 |          |          |          |          |
| 0.010109 | 0.000390 | 0.000123 | 0.000140 | 0.000119 | 0.001091 | 0.000078 | 0.512343 |
| 0.000116 | 0.000251 | 0.000122 | 0.000237 | 0.464064 | 0.000171 | 0.000160 | 0.008804 |
| 0.000968 | 0.000598 | 0.000037 | 0.000080 |          |          |          |          |
| 0.069150 | 0.001867 | 0.001421 | 0.001995 | 0.001880 | 0.012068 | 0.001035 | 0.197245 |
| 0.001782 | 0.017371 | 0.002133 | 0.001266 | 0.001573 | 0.001237 | 0.002012 | 0.002567 |
| 0.016589 | 0.665776 | 0.000327 | 0.000707 |          |          |          |          |
| 0.002081 | 0.000665 | 0.000534 | 0.001074 | 0.009166 | 0.000694 | 0.000611 | 0.127662 |
| 0.001171 | 0.795798 | 0.005702 | 0.000709 | 0.000903 | 0.001358 | 0.001391 | 0.007091 |
| 0.036237 | 0.005652 | 0.000439 | 0.001063 |          |          |          |          |

motif 8

letter-probability matrix: alength= 20 w= 10 n= 61657 E= 3.7e-856

|          |          |          |          |          |          |          |          |
|----------|----------|----------|----------|----------|----------|----------|----------|
| 0.012805 | 0.005800 | 0.005758 | 0.207482 | 0.001733 | 0.006048 | 0.000596 | 0.466060 |
| 0.011614 | 0.088472 | 0.006701 | 0.001304 | 0.000729 | 0.148273 | 0.000976 | 0.002094 |
| 0.012343 | 0.014577 | 0.000347 | 0.006289 |          |          |          |          |
| 0.000121 | 0.000070 | 0.000065 | 0.000071 | 0.017138 | 0.000092 | 0.000420 | 0.000194 |
| 0.000099 | 0.005473 | 0.000125 | 0.000158 | 0.045150 | 0.000139 | 0.000136 | 0.015190 |
| 0.000125 | 0.000209 | 0.005422 | 0.909602 |          |          |          |          |
| 0.316610 | 0.000612 | 0.000307 | 0.010401 | 0.025949 | 0.010522 | 0.000429 | 0.141159 |
| 0.015415 | 0.402038 | 0.001599 | 0.005488 | 0.000461 | 0.000611 | 0.000675 | 0.001374 |
| 0.001940 | 0.043632 | 0.010103 | 0.010676 |          |          |          |          |
| 0.010827 | 0.000269 | 0.000152 | 0.000242 | 0.060244 | 0.000286 | 0.000223 | 0.728470 |
| 0.000288 | 0.028211 | 0.001013 | 0.000255 | 0.000195 | 0.000262 | 0.000275 | 0.000543 |
| 0.010654 | 0.077709 | 0.079020 | 0.000861 |          |          |          |          |
| 0.005940 | 0.000510 | 0.000411 | 0.000827 | 0.002636 | 0.000531 | 0.000469 | 0.009925 |
| 0.000902 | 0.931725 | 0.021791 | 0.000545 | 0.000694 | 0.001045 | 0.001071 | 0.001038 |
| 0.001409 | 0.008686 | 0.004686 | 0.005158 |          |          |          |          |
| 0.002240 | 0.000580 | 0.000301 | 0.005486 | 0.011244 | 0.049833 | 0.015181 | 0.008375 |
| 0.015467 | 0.028507 | 0.006422 | 0.000565 | 0.000441 | 0.000605 | 0.413643 | 0.006232 |
| 0.001842 | 0.009016 | 0.359162 | 0.064857 |          |          |          |          |
| 0.000452 | 0.000147 | 0.000167 | 0.000219 | 0.117454 | 0.000198 | 0.005697 | 0.030273 |
| 0.025086 | 0.308926 | 0.000268 | 0.000264 | 0.000159 | 0.000236 | 0.054929 | 0.000416 |
| 0.000315 | 0.015437 | 0.010425 | 0.428933 |          |          |          |          |
| 0.051557 | 0.054455 | 0.000672 | 0.001230 | 0.006159 | 0.030245 | 0.005481 | 0.008090 |
| 0.011162 | 0.023313 | 0.006352 | 0.089118 | 0.000563 | 0.005954 | 0.476376 | 0.212462 |
| 0.002065 | 0.008739 | 0.000267 | 0.005742 |          |          |          |          |
| 0.002628 | 0.010539 | 0.005624 | 0.001035 | 0.016331 | 0.005868 | 0.025115 | 0.003846 |
| 0.006262 | 0.009238 | 0.001601 | 0.005993 | 0.000604 | 0.000855 | 0.491833 | 0.055807 |
| 0.002190 | 0.009185 | 0.000310 | 0.345136 |          |          |          |          |
| 0.002958 | 0.000729 | 0.000967 | 0.004379 | 0.000498 | 0.001305 | 0.000900 | 0.007488 |
| 0.909697 | 0.001621 | 0.015217 | 0.013478 | 0.001072 | 0.001396 | 0.020807 | 0.007459 |
| 0.007752 | 0.001274 | 0.000383 | 0.000620 |          |          |          |          |

**PIR superfamily motifs:**

motif 1

letter-probability matrix: alength= 20 w= 15 n= 38516 E= 1.1e-252

|          |          |          |          |          |          |          |          |
|----------|----------|----------|----------|----------|----------|----------|----------|
| 0.054060 | 0.000634 | 0.223503 | 0.124795 | 0.001447 | 0.095285 | 0.025996 | 0.036601 |
| 0.056582 | 0.015390 | 0.013321 | 0.120545 | 0.002475 | 0.041828 | 0.006666 | 0.100077 |
| 0.006284 | 0.014874 | 0.000457 | 0.059179 |          |          |          |          |

|          |          |          |          |          |          |          |          |
|----------|----------|----------|----------|----------|----------|----------|----------|
| 0.054060 | 0.000634 | 0.177641 | 0.147726 | 0.012912 | 0.015029 | 0.025997 | 0.025135 |
| 0.297351 | 0.015388 | 0.001856 | 0.074685 | 0.013940 | 0.041829 | 0.041063 | 0.031287 |
| 0.017750 | 0.003407 | 0.000456 | 0.001853 |          |          |          |          |
| 0.042513 | 0.035129 | 0.028363 | 0.009668 | 0.013057 | 0.049393 | 0.048893 | 0.048497 |
| 0.044677 | 0.210946 | 0.013447 | 0.017132 | 0.094264 | 0.018591 | 0.155670 | 0.019566 |
| 0.017679 | 0.003791 | 0.000470 | 0.128253 |          |          |          |          |
| 0.194693 | 0.544700 | 0.000843 | 0.013391 | 0.038749 | 0.001730 | 0.024695 | 0.020502 |
| 0.001841 | 0.009856 | 0.003793 | 0.001487 | 0.012946 | 0.001595 | 0.013541 | 0.027034 |
| 0.016513 | 0.033935 | 0.012484 | 0.025673 |          |          |          |          |
| 0.008200 | 0.000634 | 0.062990 | 0.193586 | 0.012912 | 0.015029 | 0.014532 | 0.036600 |
| 0.102444 | 0.026854 | 0.013321 | 0.109080 | 0.013940 | 0.190875 | 0.086923 | 0.042752 |
| 0.029215 | 0.003407 | 0.011922 | 0.024784 |          |          |          |          |
| 0.036924 | 0.011386 | 0.003541 | 0.004877 | 0.244292 | 0.003302 | 0.012042 | 0.005721 |
| 0.004591 | 0.074027 | 0.003626 | 0.003685 | 0.002877 | 0.003246 | 0.013565 | 0.026284 |
| 0.004920 | 0.016105 | 0.012806 | 0.512183 |          |          |          |          |
| 0.266873 | 0.001228 | 0.000605 | 0.001144 | 0.241472 | 0.013303 | 0.000854 | 0.055571 |
| 0.001349 | 0.296238 | 0.027430 | 0.001138 | 0.000920 | 0.001228 | 0.001339 | 0.002695 |
| 0.003851 | 0.032758 | 0.000587 | 0.049417 |          |          |          |          |
| 0.005634 | 0.001376 | 0.000991 | 0.001869 | 0.003201 | 0.013562 | 0.012973 | 0.267943 |
| 0.061593 | 0.021105 | 0.015399 | 0.155157 | 0.001154 | 0.001857 | 0.013986 | 0.015305 |
| 0.004609 | 0.033299 | 0.000651 | 0.368333 |          |          |          |          |
| 0.012879 | 0.000235 | 0.000258 | 0.000313 | 0.166272 | 0.000318 | 0.025961 | 0.000652 |
| 0.000372 | 0.321382 | 0.000416 | 0.000485 | 0.000254 | 0.000427 | 0.000456 | 0.025237 |
| 0.000449 | 0.000722 | 0.001096 | 0.441815 |          |          |          |          |
| 0.003289 | 0.001358 | 0.002228 | 0.002480 | 0.011866 | 0.002664 | 0.006162 | 0.002579 |
| 0.002676 | 0.010904 | 0.011668 | 0.002318 | 0.001564 | 0.002467 | 0.003193 | 0.002965 |
| 0.002655 | 0.008581 | 0.891655 | 0.026727 |          |          |          |          |
| 0.003705 | 0.001306 | 0.001378 | 0.002301 | 0.023902 | 0.001628 | 0.001163 | 0.102471 |
| 0.011739 | 0.678480 | 0.045362 | 0.001831 | 0.001719 | 0.002409 | 0.002545 | 0.002920 |
| 0.012494 | 0.099646 | 0.000774 | 0.002227 |          |          |          |          |
| 0.030502 | 0.092986 | 0.017069 | 0.009117 | 0.001337 | 0.350820 | 0.002817 | 0.013625 |
| 0.021169 | 0.003610 | 0.001690 | 0.109818 | 0.002246 | 0.018203 | 0.017530 | 0.157871 |
| 0.005731 | 0.003162 | 0.011966 | 0.128730 |          |          |          |          |
| 0.008132 | 0.000636 | 0.166139 | 0.078822 | 0.024546 | 0.060869 | 0.048938 | 0.013663 |
| 0.056453 | 0.003913 | 0.013309 | 0.109062 | 0.002457 | 0.030276 | 0.006596 | 0.088548 |
| 0.006229 | 0.003391 | 0.000467 | 0.277557 |          |          |          |          |
| 0.031077 | 0.000652 | 0.005544 | 0.147626 | 0.001486 | 0.003516 | 0.003017 | 0.105619 |
| 0.354760 | 0.061424 | 0.047795 | 0.028733 | 0.002440 | 0.099088 | 0.029509 | 0.019704 |
| 0.029187 | 0.015032 | 0.000461 | 0.013329 |          |          |          |          |
| 0.003868 | 0.001157 | 0.000825 | 0.011327 | 0.034026 | 0.001241 | 0.000987 | 0.243432 |
| 0.021194 | 0.543331 | 0.036908 | 0.010881 | 0.001360 | 0.002000 | 0.011766 | 0.002429 |
| 0.003339 | 0.048096 | 0.000693 | 0.021143 |          |          |          |          |

motif 2

letter-probability matrix: alength= 20 w= 10 n= 39116 E= 1.1e-215

|          |          |          |          |          |          |          |          |
|----------|----------|----------|----------|----------|----------|----------|----------|
| 0.046582 | 0.000547 | 0.113554 | 0.087774 | 0.011127 | 0.012949 | 0.012521 | 0.090818 |
| 0.236465 | 0.003382 | 0.001600 | 0.084113 | 0.012012 | 0.026162 | 0.035382 | 0.017078 |
| 0.015294 | 0.190649 | 0.000393 | 0.001597 |          |          |          |          |
| 0.096134 | 0.021542 | 0.000640 | 0.001208 | 0.033299 | 0.011592 | 0.031306 | 0.169799 |
| 0.011564 | 0.231624 | 0.013428 | 0.021478 | 0.071926 | 0.011406 | 0.092652 | 0.002844 |
| 0.004009 | 0.079948 | 0.000583 | 0.093018 |          |          |          |          |
| 0.156971 | 0.305451 | 0.000633 | 0.011337 | 0.084000 | 0.001451 | 0.021165 | 0.017721 |
| 0.001414 | 0.180942 | 0.013431 | 0.001194 | 0.000950 | 0.001260 | 0.011533 | 0.033256 |
| 0.014147 | 0.110378 | 0.010722 | 0.022045 |          |          |          |          |
| 0.007062 | 0.000547 | 0.054274 | 0.147047 | 0.021008 | 0.012948 | 0.042159 | 0.239021 |
| 0.048748 | 0.013267 | 0.001602 | 0.074232 | 0.012011 | 0.174354 | 0.055138 | 0.026955 |
| 0.005414 | 0.022703 | 0.010273 | 0.031236 |          |          |          |          |
| 0.032909 | 0.001890 | 0.002854 | 0.003954 | 0.201291 | 0.002728 | 0.017941 | 0.146653 |
| 0.003746 | 0.058750 | 0.011471 | 0.003015 | 0.002353 | 0.002672 | 0.003627 | 0.006582 |
| 0.004205 | 0.031204 | 0.011303 | 0.450851 |          |          |          |          |
| 0.241882 | 0.000283 | 0.000104 | 0.000199 | 0.169576 | 0.000234 | 0.000171 | 0.098103 |



|      |       |       |       |       |       |       |       |       |       |       |   |
|------|-------|-------|-------|-------|-------|-------|-------|-------|-------|-------|---|
| 720  | 275   | 394   | 45    | 96    | 359   | 117   | -369  | -294  | -249  |       |   |
| -    | -98   | -7190 | -8232 | -894  | -1115 | -701  | -1378 | -4781 | -4174 |       |   |
| 6    | -38   | -399  | -2114 | -1521 | 908   | -1899 | -704  | 91    | -1237 | 1462  |   |
| 408  | -1303 | -1957 | -983  | -385  | 179   | -385  | 179   | -788  | 1613  | 6     |   |
| -    | -149  | -500  | 233   | 43    | -381  | 399   | 106   | -626  | 210   | -466  | - |
| 720  | 275   | 394   | 45    | 96    | 359   | 117   | -369  | -294  | -249  |       |   |
| -    | -103  | -7196 | -8238 | -894  | -1115 | -701  | -1378 | -4781 | -4092 |       |   |
| 7    | -1209 | -2368 | -1030 | -440  | -2813 | -1971 | 2291  | -2448 | 1988  | -2287 | - |
| 1493 | -623  | -2040 | 2822  | 460   | -1086 | -1071 | -2103 | -2297 | -1868 | 7     |   |
| -    | -149  | -500  | 233   | 43    | -381  | 399   | 106   | -626  | 210   | -466  | - |
| 720  | 275   | 394   | 45    | 96    | 359   | 117   | -369  | -294  | -249  |       |   |
| -    | -108  | -7201 | -8243 | -894  | -1115 | -701  | -1378 | -4781 | -4005 |       |   |
| 8    | -498  | -1889 | 1030  | 196   | -2208 | -1452 | 2259  | -863  | 1211  | -1883 | - |
| 987  | -96   | -1543 | 371   | 1692  | -387  | -429  | -1513 | -2051 | -1415 | 8     |   |
| -    | -149  | -500  | 233   | 43    | -381  | 399   | 106   | -626  | 210   | -466  | - |
| 720  | 275   | 394   | 45    | 96    | 359   | 117   | -369  | -294  | -249  |       |   |
| -    | -115  | -7207 | -8249 | -894  | -1115 | -701  | -1378 | -4781 | -3913 |       |   |
| 9    | -1001 | -1124 | -2000 | -1465 | -760  | -2337 | -1130 | 15    | -1077 | 1307  |   |
| 186  | -1492 | -2374 | 2645  | -1252 | -1409 | -948  | 1218  | -1529 | -1165 | 9     |   |
| -    | -149  | -500  | 233   | 43    | -381  | 399   | 106   | -626  | 210   | -466  | - |
| 720  | 275   | 394   | 45    | 96    | 359   | 117   | -369  | -294  | -249  |       |   |
| -    | -122  | -7215 | -8257 | -894  | -1115 | -701  | -1378 | -4781 | -3814 |       |   |
| 10   | -1846 | -2272 | -1848 | -1420 | -410  | -2534 | -625  | -2175 | 1966  | -2054 | - |
| 1576 | -1395 | -2652 | -798  | -345  | -1827 | -1747 | -2040 | -930  | 3834  | 10    |   |
| -    | -149  | -500  | 233   | 43    | -381  | 399   | 106   | -626  | 210   | -466  | - |
| 720  | 275   | 394   | 45    | 96    | 359   | 117   | -369  | -294  | -249  |       |   |
| -    | -131  | -7223 | -8265 | -894  | -1115 | -701  | -1378 | -4781 | -3708 |       |   |
| 11   | -478  | -750  | -1329 | -748  | -746  | -253  | 1677  | 229   | -421  | 1566  |   |
| 74   | -814  | -1823 | -394  | 492   | -763  | -414  | -198  | -1134 | -716  | 11    |   |
| -    | -149  | -500  | 233   | 43    | -381  | 399   | 106   | -626  | 210   | -466  | - |
| 720  | 275   | 394   | 45    | 96    | 359   | 117   | -369  | -294  | -249  |       |   |
| -    | -140  | -7233 | -8275 | -894  | -1115 | -701  | -1378 | -4781 | -3594 |       |   |
| 12   | -2126 | -2788 | -2709 | -1452 | -3623 | -2637 | -579  | -2974 | 1876  | -2641 | - |
| 1979 | -1347 | -2598 | -164  | 3439  | -2013 | -1821 | -2746 | -2481 | -2380 | 12    |   |
| -    | *     | *     | *     | *     | *     | *     | *     | *     | *     | *     | * |
| *    | *     | *     | *     | *     | *     | *     | *     | *     | *     | *     | * |
| -    | *     | *     | *     | *     | *     | *     | *     | *     | -4781 | 0     |   |

//

hmm 2

HMMER2.0 [2.3.1]

NAME motifs\_crh\_m12b

LENG 25

ALPH Amino

RF no

CS no

MAP yes

COM hmmbuild -f m\_cfh\_m12\_fragb.hmm motifs\_crh\_m12b.aln

COM hmmcalibrate m\_cfh\_m12\_fragb.hmm

NSEQ 16

DATE Thu May 13 15:55:16 2004

CKSUM 4635

XT -8455 -4 -1000 -1000 -8455 -4 -8455 -4

NULT -4 -8455

NULE 595 -1558 85 338 -294 453 -1158 197 249 902 -

1085 -142 -21 -313 45 531 201 384 -1998 -644

EVD -7.945719 0.645052

HMM A C D E F G H I K L

M N P Q R S T V W Y

m->m m->i m->d i->m i->i d->m d->d b->m m->e

1 -590 -1320 -549 -756 -2777 3060 -1315 -2721 -1334 -2854 -



|      |       |       |       |       |       |       |       |       |       |       |   |
|------|-------|-------|-------|-------|-------|-------|-------|-------|-------|-------|---|
| 2097 | 906   | -1837 | -1103 | -1662 | -698  | -904  | -1991 | -2850 | -2398 | 1     |   |
| -    | -149  | -500  | 233   | 43    | -381  | 399   | 106   | -626  | 210   | -466  | - |
| 720  | 275   | 394   | 45    | 96    | 359   | 117   | -369  | -294  | -249  |       |   |
| -    | -52   | -6703 | -7745 | -894  | -1115 | -701  | -1378 | -1415 | -5586 |       |   |
| 2    | -290  | -952  | -632  | 454   | 1314  | -1423 | -100  | 661   | 920   | -850  | - |
| 109  | -262  | -1500 | 187   | 1053  | -389  | -224  | -440  | -1279 | -794  | 2     |   |
| -    | -149  | -500  | 233   | 43    | -381  | 399   | 106   | -626  | 210   | -466  | - |
| 720  | 275   | 394   | 45    | 96    | 359   | 117   | -369  | -294  | -249  |       |   |
| -    | -52   | -6703 | -7745 | -894  | -1115 | -701  | -1378 | -6000 | -5555 |       |   |
| 3    | -1362 | -2623 | 3511  | 107   | -3304 | 99    | -943  | -3268 | -1172 | -3232 | - |
| 2575 | -245  | -1973 | -650  | -1899 | -1160 | -1498 | -2726 | -3219 | -2522 | 3     |   |
| -    | -149  | -500  | 233   | 43    | -381  | 399   | 106   | -626  | 210   | -466  | - |
| 720  | 275   | 394   | 45    | 96    | 359   | 117   | -369  | -294  | -249  |       |   |
| -    | -53   | -6704 | -7746 | -894  | -1115 | -701  | -1378 | -6000 | -5525 |       |   |
| 4    | -1525 | -2322 | -1764 | -851  | -3005 | -2129 | -254  | -2471 | 3179  | -2226 | - |
| 1532 | -853  | -2146 | 158   | 1509  | -1424 | -1300 | -2209 | -2135 | -1932 | 4     |   |
| -    | -149  | -500  | 233   | 43    | -381  | 399   | 106   | -626  | 210   | -466  | - |
| 720  | 275   | 394   | 45    | 96    | 359   | 117   | -369  | -294  | -249  |       |   |
| -    | -54   | -6705 | -7747 | -894  | -1115 | -701  | -1378 | -6000 | -5493 |       |   |
| 5    | -394  | -797  | -1024 | -446  | -558  | -1584 | -217  | -421  | -38   | 360   |   |
| 22   | -549  | -1660 | -96   | 1384  | 100   | -329  | -278  | -948  | 2166  | 5     |   |
| -    | -149  | -500  | 233   | 43    | -381  | 399   | 106   | -626  | 210   | -466  | - |
| 720  | 275   | 394   | 45    | 96    | 359   | 117   | -369  | -294  | -249  |       |   |
| -    | -54   | -6705 | -7747 | -894  | -1115 | -701  | -1378 | -6000 | -5459 |       |   |
| 6    | 41    | -236  | -1836 | -1247 | 963   | -1698 | -496  | 256   | -974  | 1435  |   |
| 578  | -1066 | -1756 | -738  | -377  | -117  | -198  | 343   | -622  | 799   | 6     |   |
| -    | -149  | -500  | 233   | 43    | -381  | 399   | 106   | -626  | 210   | -466  | - |
| 720  | 275   | 394   | 45    | 96    | 359   | 117   | -369  | -294  | -249  |       |   |
| -    | -55   | -6706 | -7749 | -894  | -1115 | -701  | -1378 | -6000 | -5427 |       |   |
| 7    | -830  | -2022 | -652  | -83   | -2422 | -1635 | 2187  | -2077 | 2052  | -1954 | - |
| 1144 | -289  | -1712 | 2231  | 622   | -714  | -709  | -1725 | -2005 | -1534 | 7     |   |
| -    | -149  | -500  | 233   | 43    | -381  | 399   | 106   | -626  | 210   | -466  | - |
| 720  | 275   | 394   | 45    | 96    | 359   | 117   | -369  | -294  | -249  |       |   |
| -    | -56   | -6707 | -7749 | -894  | -1115 | -701  | -1378 | -6000 | -5393 |       |   |
| 8    | -338  | -1661 | 423   | 330   | -1957 | -1299 | 2341  | -744  | 1064  | -1644 | - |
| 766  | 45    | -1389 | 519   | 1575  | -240  | -267  | -1273 | -1833 | -1217 | 8     |   |
| -    | -149  | -500  | 233   | 43    | -381  | 399   | 106   | -626  | 210   | -466  | - |
| 720  | 275   | 394   | 45    | 96    | 359   | 117   | -369  | -294  | -249  |       |   |
| -    | -57   | -6708 | -7750 | -894  | -1115 | -701  | -1378 | -6000 | -5359 |       |   |
| 9    | -706  | -988  | -1420 | -892  | -615  | -1947 | -700  | 11    | -518  | 1358  |   |
| 326  | -989  | -2002 | 2370  | -747  | -1000 | -653  | 561   | -1322 | -923  | 9     |   |
| -    | -149  | -500  | 233   | 43    | -381  | 399   | 106   | -626  | 210   | -466  | - |
| 720  | 275   | 394   | 45    | 96    | 359   | 117   | -369  | -294  | -249  |       |   |
| -    | -58   | -6709 | -7751 | -894  | -1115 | -701  | -1378 | -6000 | -5323 |       |   |
| 10   | -1167 | -1745 | -1202 | -737  | -398  | -1975 | -251  | -1578 | 2053  | -1562 | - |
| 989  | -805  | -2086 | -233  | 74    | -1170 | -1076 | -1412 | -847  | 3263  | 10    |   |
| -    | -149  | -500  | 233   | 43    | -381  | 399   | 106   | -626  | 210   | -466  | - |
| 720  | 275   | 394   | 45    | 96    | 359   | 117   | -369  | -294  | -249  |       |   |
| -    | -59   | -6710 | -7752 | -894  | -1115 | -701  | -1378 | -6000 | -5286 |       |   |
| 11   | -276  | -695  | -897  | -327  | -720  | -7    | 1540  | 214   | -63   | 1007  |   |
| 132  | -458  | -1570 | -34   | 595   | -484  | -214  | -159  | -1063 | -618  | 11    |   |
| -    | -149  | -500  | 233   | 43    | -381  | 399   | 106   | -626  | 210   | -466  | - |
| 720  | 275   | 394   | 45    | 96    | 359   | 117   | -369  | -294  | -249  |       |   |
| -    | -60   | -6711 | -7753 | -894  | -1115 | -701  | -1378 | -6000 | -5249 |       |   |
| 12   | -1631 | -2342 | -1987 | -990  | -3049 | -2201 | -285  | -2498 | 1498  | -2247 | - |
| 1573 | -946  | -2211 | 121   | 3372  | -1541 | -1389 | -2256 | -2141 | -1974 | 12    |   |
| -    | -149  | -500  | 233   | 43    | -381  | 399   | 106   | -626  | 210   | -466  | - |
| 720  | 275   | 394   | 45    | 96    | 359   | 117   | -369  | -294  | -249  |       |   |
| -    | -61   | -6712 | -7754 | -894  | -1115 | -701  | -1378 | -6000 | -5210 |       |   |
| 13   | 29    | 276   | -40   | 359   | -411  | -792  | 613   | -320  | 465   | -632  |   |
| 485  | 255   | -679  | 621   | 145   | -1    | 148   | -194  | 455   | -83   | 13    |   |
| -    | -149  | -491  | 232   | 43    | -379  | 397   | 109   | -625  | 210   | -467  | - |
| 714  | 275   | 393   | 46    | 96    | 358   | 117   | -369  | -284  | -247  |       |   |
| -    | -1877 | -524  | -7755 | -3166 | -170  | -701  | -1378 | -6000 | -5171 |       |   |

|      |       |       |       |       |       |       |       |       |       |       |      |
|------|-------|-------|-------|-------|-------|-------|-------|-------|-------|-------|------|
| 14   | -1243 | -941  | -3389 | -2895 | -784  | -3084 | -2211 | 2973  | -2594 | 935   |      |
| 295  | -2655 | -2995 | -2325 | -2573 | -2270 | -324  | 1072  | -1940 | -1632 | 46    |      |
|      | -     | -149  | -500  | 233   | 43    | -381  | 399   | 106   | -626  | 210   | -466 |
| 720  | 275   | 394   | 45    | 96    | 359   | 117   | -369  | -294  | -249  |       |      |
|      | -     | -63   | -6714 | -7756 | -894  | -1115 | -701  | -1378 | -6000 | -5130 |      |
| 15   | 1139  | -701  | -1084 | -615  | -1368 | -1145 | -601  | -208  | -484  | -1215 | -    |
| 466  | -604  | 2207  | -375  | -816  | 154   | 612   | -619  | -1659 | -1220 | 47    |      |
|      | -     | -149  | -500  | 233   | 43    | -381  | 399   | 106   | -626  | 210   | -466 |
| 720  | 275   | 394   | 45    | 96    | 359   | 117   | -369  | -294  | -249  |       |      |
|      | -     | -64   | -6715 | -7757 | -894  | -1115 | -701  | -1378 | -6000 | -5088 |      |
| 16   | -1403 | -986  | -3866 | -3469 | -1339 | -3572 | -3096 | 2660  | -3293 | -247  | -    |
| 160  | -3223 | -3437 | -3115 | -3342 | -2850 | -1393 | 2622  | -2715 | -2300 | 48    |      |
|      | -     | -149  | -500  | 233   | 43    | -381  | 399   | 106   | -626  | 210   | -466 |
| 720  | 275   | 394   | 45    | 96    | 359   | 117   | -369  | -294  | -249  |       |      |
|      | -     | -66   | -6717 | -7759 | -894  | -1115 | -701  | -1378 | -6000 | -5046 |      |
| 17   | -413  | -254  | -2506 | -1904 | 872   | -1982 | -870  | 2167  | -1571 | 454   |      |
| 580  | -1536 | -2018 | -1251 | -1480 | -471  | 246   | 1142  | -803  | -452  | 49    |      |
|      | -     | -149  | -500  | 233   | 43    | -381  | 399   | 106   | -626  | 210   | -466 |
| 720  | 275   | 394   | 45    | 96    | 359   | 117   | -369  | -294  | -249  |       |      |
|      | -     | -67   | -6718 | -7760 | -894  | -1115 | -701  | -1378 | -6000 | -5001 |      |
| 18   | -885  | -777  | -2601 | -2091 | 1336  | -2321 | -1003 | 230   | -1782 | 2211  |      |
| 594  | -1792 | -2345 | -1444 | -1742 | -369  | -845  | 63    | -760  | -157  | 50    |      |
|      | -     | -149  | -500  | 233   | 43    | -381  | 399   | 106   | -626  | 210   | -466 |
| 720  | 275   | 394   | 45    | 96    | 359   | 117   | -369  | -294  | -249  |       |      |
|      | -     | -68   | -6719 | -7761 | -894  | -1115 | -701  | -1378 | -6000 | -4955 |      |
| 19   | 269   | -312  | -1775 | -1200 | -340  | 451   | -599  | 1558  | -963  | 417   |      |
| 464  | -1069 | -1795 | -748  | -1073 | -767  | 687   | 696   | -829  | -455  | 51    |      |
|      | -     | -149  | -500  | 233   | 43    | -381  | 399   | 106   | -626  | 210   | -466 |
| 720  | 275   | 394   | 45    | 96    | 359   | 117   | -369  | -294  | -249  |       |      |
|      | -     | -70   | -6722 | -7764 | -894  | -1115 | -701  | -1378 | -6000 | -4909 |      |
| 20   | -1465 | -1060 | -3836 | -3392 | -1025 | -3565 | -2872 | 3173  | -3169 | 419   |      |
| 127  | -3172 | -3378 | -2891 | -3165 | -2814 | -1439 | 1539  | -2411 | -2084 | 52    |      |
|      | -     | -149  | -500  | 233   | 43    | -381  | 399   | 106   | -626  | 210   | -466 |
| 720  | 275   | 394   | 45    | 96    | 359   | 117   | -369  | -294  | -249  |       |      |
|      | -     | -72   | -6723 | -7765 | -894  | -1115 | -701  | -1378 | -6000 | -4860 |      |
| 21   | 623   | -336  | -1906 | -1333 | -333  | -1767 | -682  | 815   | -1081 | 1420  |      |
| 487  | -1169 | -1854 | -854  | -1164 | 316   | -297  | 717   | -861  | -497  | 53    |      |
|      | -     | -149  | -500  | 233   | 43    | -381  | 399   | 106   | -626  | 210   | -466 |
| 720  | 275   | 394   | 45    | 96    | 359   | 117   | -369  | -294  | -249  |       |      |
|      | -     | -74   | -6725 | -7767 | -894  | -1115 | -701  | -1378 | -6000 | -4809 |      |
| 22   | -2742 | -2290 | -3014 | -3139 | 701   | -3008 | -615  | -2258 | -2836 | -1879 | -    |
| 1835 | -2399 | -3220 | -2421 | -2640 | -2733 | -2781 | -2314 | 18    | 4561  | 54    |      |
|      | -     | -149  | -500  | 233   | 43    | -381  | 399   | 106   | -626  | 210   | -466 |
| 720  | 275   | 394   | 45    | 96    | 359   | 117   | -369  | -294  | -249  |       |      |
|      | -     | -76   | -6727 | -7769 | -894  | -1115 | -701  | -1378 | -6000 | -4757 |      |
| 23   | -712  | -1004 | -1447 | -832  | -958  | -1942 | -583  | 1750  | 2053  | 83    |      |
| -8   | -917  | -1986 | -366  | -290  | -1001 | -639  | 143   | -1452 | -1042 | 55    |      |
|      | -     | -149  | -500  | 233   | 43    | -381  | 399   | 106   | -626  | 210   | -466 |
| 720  | 275   | 394   | 45    | 96    | 359   | 117   | -369  | -294  | -249  |       |      |
|      | -     | -78   | -6729 | -7771 | -894  | -1115 | -701  | -1378 | -6000 | -4702 |      |
| 24   | -897  | -717  | -2633 | -2136 | 679   | -2286 | -387  | 582   | -1789 | -313  |      |
| 155  | -1626 | -2304 | -1390 | -1687 | -1377 | -832  | 623   | 3719  | 2930  | 56    |      |
|      | -     | -149  | -500  | 233   | 43    | -381  | 399   | 106   | -626  | 210   | -466 |
| 720  | 275   | 394   | 45    | 96    | 359   | 117   | -369  | -294  | -249  |       |      |
|      | -     | -80   | -6731 | -7773 | -894  | -1115 | -701  | -1378 | -6000 | -4646 |      |
| 25   | -295  | -473  | -1325 | -786  | -335  | -1598 | -380  | -44   | -545  | 1511  |      |
| 322  | 293   | -1693 | -422  | -748  | 478   | -248  | 69    | 1222  | -302  | 57    |      |
|      | -     | *     | *     | *     | *     | *     | *     | *     | *     | *     | *    |
| *    | *     | *     | *     | *     | *     | *     | *     | *     | *     | *     | *    |
|      | -     | *     | *     | *     | *     | *     | *     | *     | -6000 | 0     |      |

//
